# Supplementary material
Source: publisher figshare collection journal article supplement (https://sage.figshare.com/ndownloader/files/19255751)
Supplement: Supplementary file 1 [file 19255751]

**Supplementary Table 1.** Sample Characteristics

|                          | Total Cancer Blogs<br>( <i>N</i> = 89) |
|--------------------------|----------------------------------------|
| Descriptive              | <i>N</i> (%)                           |
| Role of Blogger          |                                        |
| Cancer patient/survivor  | 67 (75.3%)                             |
| Cancer caregiver         | 22 (24.7%)                             |
| Cancer Type              |                                        |
| Breast                   | 17 (19.1%)                             |
| Colon/rectal             | 2 (2.2%)                               |
| Kidney (renal cell)      | 1 (1.1%)                               |
| Leukemia                 | 11 (12.4%)                             |
| Hodgkin Lymphoma         | 6 (6.7%)                               |
| Non-Hodgkin Lymphoma     | 3 (3.4%)                               |
| Melanoma                 | 6 (6.7%)                               |
| Prostate                 | 2 (2.2%)                               |
| Thyroid                  | 1 (1.1%)                               |
| Other                    | 37 (41.6%)                             |
| Not reported/Unknown     | 3 (3.4%)                               |
| Gender of Blogger        |                                        |
| Female                   | 72 (80.9%)                             |
| Male                     | 17 (19.1%)                             |
| Gender of Cancer Patient |                                        |
| Female                   | 87 (97.8%)                             |
| Male                     | 2 (2.2%)                               |

**Supplementary Table 2.** Number of Inlinks and Outlinks for the Most Highly Linked Cancer Blogs

|                                       | Inlinks <sup>a</sup> | Outlinks <sup>b</sup> |
|---------------------------------------|----------------------|-----------------------|
| Cancer Blog Website                   | <i>N</i>             | <i>N</i>              |
| Breast Cancer ( <i>N</i> = 13)        |                      |                       |
| nancyspoint.com                       | 9                    | 13                    |
| bumpyboobs.wordpress.com              | 9                    | 4                     |
| ihatebreastcancer.wordpress.com       | 7                    | 11                    |
| thesarcasticboob.com                  | 7                    | 9                     |
| chemo-brain.blogspot.com              | 7                    | 3                     |
| accidentalamazon.com                  | 6                    | 10                    |
| butdoctorihatepink.com                | 6                    | 10                    |
| carolinemfr.blogspot.com              | 6                    | 2                     |
| anotheronewiththecancer.wordpress.com | 5                    | 6                     |
| boobyandthebeast.com                  | 4                    | 7                     |
| notjustaboutcancer.blogspot.com       | 4                    | 7                     |
| darngoodlemonade.com                  | 4                    | 1                     |
| womenwcancer.blogspot.com             | 4                    | 0                     |
| Other Cancers ( <i>N</i> = 2)         |                      |                       |
| caringbridge.org                      | 6                    | 0                     |
| cheekylibrarian.blogspot.com          | 0                    | 1                     |

*Note.* <sup>a</sup>Links *from* the network. <sup>b</sup>Links *to* the network.
